# Supplementary material for: Comparing the Cohort and Micro-Simulation Modeling Approaches in Cost-Effectiveness Modeling of Type 2 Diabetes Mellitus: A Case Study of the IHE Diabetes Cohort Model and the Economics and Health Outcomes Model of T2DM
Source: Springer Nature journal article supplement (doi:10.1007/s40273-020-00922-6), 2020-05-13
Supplement: MOESM3 [file 24131106]

**Electronic Supplementary Material 3**

**Comparing the Cohort and Micro-Simulation Modeling Approaches in Cost-Effectiveness Modelling of Type 2 Diabetes Mellitus (T2DM): A Case Study of the IHE Diabetes Cohort Model and the Economics and Health Outcomes Model of T2DM**

**Journal: Pharmacoeconomics**

Michael Willis<sup>1</sup>  
Adam Fridhammar<sup>1</sup>  
Jens Gundgaard<sup>2</sup>  
Andreas Nilsson<sup>1</sup>  
Pierre Johansen<sup>2</sup>

<sup>1</sup>The Swedish Institute for Health Economics, Lund, Sweden

<sup>2</sup>Novo Nordisk A/S, Søborg, Denmark

**Corresponding author:**

Michael Willis, PhD

The Swedish Institute for Health Economics

Box 2017

SE-220 02 Lund

Email: mw@ihe.se

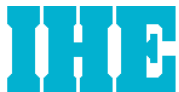

**AdViSHE Validation Assessment Tool:  
The Economics and Health Outcomes Model of Type 2 Diabetes Mellitus (ECHO-  
T2DM)**

Michael Willis, PhD  
Andreas Nilsson, MSc

The Swedish Institute for Health Economics  
Lund, Sweden  
[www.ihe.se](http://www.ihe.se)

December 13, 2019

## Part A: Validation of the Conceptual Model

- **A1: Have experts been asked to judge the appropriateness of the conceptual model?**

Yes, ECHO-T2DM has been continuously evaluated for face validity since the first model version was completed in 1997, including feedback regarding design and programming from clinical experts. Additionally, the conceptual model has been peer-reviewed by scientific journal editors and independent reviewers in the course of two published model applications and two published model validity study. The model has also been presented and described in more than 40 posters and several podium presentations to the diabetes modeling community (see Reference List at the end of this document).

In a recent literature review of T2DM models, Charokopou and colleagues concluded that ECHO-T2DM fulfilled all criteria specified in their structured assessment of suitability for modeling long-term health-economic consequences in T2DM [1].

- “The thirteen newly-identified models were qualitatively assessed using a structural framework in order to assess which of these models are appropriate for projecting long-term health-economic consequences of chronic T2DM treatment. Based on this assessment, the CARDIFF, Sheffield T2DM, and ECHO-T2DM models fulfilled all criteria” (p. 216).

ECHO-T2DM has also been scrutinized by Health Technology Assessment (HTA) reviewers in a number of countries, including the National Institute for Health and Care Excellence (NICE) in the U.K. [2], Canadian Agency for Drugs and Technologies in Health (CADTH) [3], Scottish Medicines Consortium (SMC) [4], and National Centre for Pharmacoeconomics (NCPE) in Ireland [5]. These objective decision-makers in each country judged ECHO-T2DM to be suitable for estimating cost-effectiveness for the study problems considered, implicitly (and in some cases explicitly) approving the conceptual model of ECHO-T2DM. In particular:

- NICE
  - 2013: NICE Evidence Review Group (ERG) conducted by Southampton Health Technology Assessment Centre (SHTAC) independently investigated the model codes and concluded that: “The economic model captures all important aspects of the disease pathway and extrapolates intermediate outcomes to final outcomes in a robust and consistent manner, drawing upon standard sources from the literature.” [6] (p. 14-15). “Overall the ERG considers that the model is internally consistent [...] and that the results of the model make intuitive sense” (p. 120). In addition, the ERG was able to independently run ECHO-T2DM and was able to replicate the results to within stochastic variability [6] (Table 67 and 68, p. 131).
  - 2014: “The Committee observed that the manufacturer’s ECHO-T2DM model followed the NICE reference case and methodology and noted the ERG’s view that the model had been well validated. Despite some uncertainty about the stability of the results, the Committee concluded that the manufacturer’s model was suitable for assessing the cost effectiveness of canagliflozin in combination therapy for treating type 2 diabetes” [7] (p. 45)
  - 2016: “The committee acknowledged there were different advantages and disadvantages to the different modelling approaches, and it agreed with the AG that all models submitted were appropriate and of a reasonable quality” [2] (p.37)
- SMC
  - 2014: “As with other SMC submissions using diabetes models, there was some concern surrounding the appropriateness of using short term outcome measures to estimate long term treatment effects. However, the company has developed their economic analysis taking into account of relevant good practice guidance for economic modelling” [4] (p. 10)
- CADTH

- 2014: The Common Drug Review (CDR) was also able to independently run ECHO-T2DM and ran additional analysis of their own (changing input values for e.g., HbA1c, SBP and BMI), “thus indicating the robustness of the manufacturer’s results” [7] (p. 20).

ECHO-T2DM has also been represented at the six most recent Mt. Hood Challenges, a biennial forum for computer modelers of diabetes to discuss and compare models, consider the appropriateness of conceptual model structure, and identify key areas of future development to advance the field [8-11]. Participants include representatives from pharmaceutical companies, academia, HTA bodies, and modelling groups. With the focal point of these challenges being to compare the structure and performance of diabetes simulation models, we refer the reader to Items **A2**, **D2** and **D4** for additional information. Continuous participation of ECHO-T2DM at the Mt. Hood Challenges and other fora however, has ensured a constant scrutiny of the conceptual model by leading experts in the field.

- **A2: Has this model been compared to other conceptual models found in the literature or clinical textbooks?**

Yes. Comparing the structure and performance of diabetes simulation models is a focal point of the biennial Mt. Hood Challenges. There, the modeling groups are asked to attempt to replicate outcomes from key RCTs or observational data sets. Participants include representatives from pharmaceutical companies, academia, HTA bodies, and modelling groups. Comparison of conceptual models has been a key topic at all Mt. Hood Challenges, but the following activities in Mt. Hood Challenge 6 and 7 shed specific light on comparisons of the conceptual models:

- Mt. Hood 6 Challenge (2012): Eight modelling groups participated and the focus of the conference was validation and uncertainty. The validation challenge consisted of predicting CVD and mortality patterns across a number different country settings and using naturalistic data. Kaiser Permanente Northwest [KPNW] in the US and the Swedish National Diabetes Registry [NDR] in Sweden) and an RCT (sub-groups in ADVANCE). Each modeling group presented their replication results, which were then compared and contrasted by all the modeling groups and public. The uncertainty challenge consisted of estimating mean and Monte Carlo error across a series of outcomes and pre-defined number of replicates in order to understand how many replicates are required for the participating models to limit Monte Carlo error to acceptable levels
- Mt. Hood 7 Challenge (2014): 11 modelling groups participated and the focus was on validation. This conference consisted of three challenges: (1) replicate the Look AHEAD study, (2) replicate mortality after various CVD events from an observational study [12], and (3) investigate the impact on model outcomes due to assumptions about ethnicity. Each modeling group presented their replication results, which were then compared and contrasted by all the modeling groups and the public.

In addition, NICE in the UK conducted a mixed treatment appraisal of canagliflozin, empagliflozin, and dapagliflozin in 2016 [2], where the ECHO-T2DM model was used to generate evidence for the canagliflozin submission and concluded that:

- “(...) there were different advantages and disadvantages to the different modelling approaches, and it agreed with the AG that all models submitted were appropriate and of a reasonable quality” (p. 37)

## **Part B: Input Data Validation**

- **B1: Have experts been asked to judge the appropriateness of the input data?**

Yes. Although it is unclear where to draw the line between the conceptual model and input data, experts have regularly weighed in on the appropriateness of inputs used in ECHO-T2DM. In a broad sense, any risk equation used in ECHO-T2DM is “input data”. In a narrow sense, “input data” can be interpreted as the values that are entered into ECHO-T2DM by a user to parameterize

a given application (e.g., mean age of the cohort at study baseline), which differs from programmed features of the model which cannot be modified by the user without changing the source code (e.g., the macrovascular risk equations supported in the model).

While some of the choices made in selecting risk equations may be unique to ECHO-T2DM, there is broad consensus among diabetes modelers about others, such as the UKPDS equations used to estimate risks of cardiovascular events and mortality.

In the narrow sense of “input”, that is, the data required to populate the simulations for this manuscript, not all inputs have been judged by independent experts.

- **B2: When input parameters are based on regression models, have statistical tests been performed?**

Yes. Regression models as a source of risk predictions are hard-coded into model programming, but regressions models for QALY disutility values, such as the CODE-2 [13], can be customized by the model as “user inputs”. Statistical assessments of the validity and adequacy of these regression models are largely available in their respective publications. The UKPDS equations used in ECHO for the prediction of macrovascular risks and mortality are well-established in T2DM modeling and appropriate statistical tests were performed.

### **Part C: Validation of the Computerized Model**

- **C1: Has the computerized model been examined by modeling experts?**

Yes. As part of HTA submissions, independent and objective HTA boards such as NICE (UK), SMC (Scotland), NCPE (Ireland), and CADTH (Canada) have all reviewed the structure of ECHO-T2DM and its cost-effectiveness applications (see the entry for **A1**)

- NICE Evidence Review Group (ERG) conducted by Southampton Health Technology Assessment Centre (SHTAC) independently investigated the model codes and was able to replicate the results to within stochastic variability [6] (Table 67 and 68, p. 131).
- The NICE review of canagliflozin, empagliflozin, and dapagliflozin [2], where ECHO-T2DM was submitted to support the canagliflozin application, and “The committee [...] agreed with the AG that all models submitted were appropriate and of a reasonable quality” (p. 37)
- SMC assessed a cost-effectiveness application of ECHO-T2DM in 2014, and concluded that “the economic case has been demonstrated” (p. 10) [4], thus implicitly asserting adequacy of the computerized model
- CADTH assessed the cost-effectiveness of canagliflozin including evidence generated using ECHO-T2DM and ruled for reimbursement, thus implicitly accepting ECHO-T2DM as a credible source of health-economic evidence [3]

- **C2: Has the model been run for specific, extreme sets of parameter values in order to detect any coding errors?**

Yes, every time a programming change is made to the model, the implementation is tested systematically and debugged by both the programmer and other staff at the Swedish Institute for Health Economics.

As part of a CADTH 2014 submission, the Common Drug Review (CDR) was also able to independently run ECHO-T2DM and ran additional analysis of their own (changing input values for e.g., HbA1c, SBP and BMI), “thus indicating the robustness of the manufacturer’s results” [14] (p. 20).

Formal verification tests of ECHO-T2DM have been conducted twice. The first was conducted by external analysts and included a structured audit of ECHO-T2DM. 67 “stress tests” were specified and then conducted, and all results were consistent with expectations [15]. The results of the second “stress tests” are presented in the latest model validation [16].

- **C3: Have patients been tracked through the model to determine whether its logic is correct?**

Yes. While ECHO-T2DM does not ordinarily produce any output on individual patients, the code is regularly inspected and traces of health states and biomarkers are examined for individual patients to assess correct implementation in the computerized model and plausibility of assumptions. Because of space limitations in journal publications, and also due to the repetitive and iterative nature of this type of testing in multi-application models, these tests and their outcomes have not been reported.

- **C4: Have individual sub-modules of the computerized model been tested?**

Yes, see response to **C2**, above. Furthermore, when model improvements are made to any sub-module of ECHO-T2DM, the modified sub-module is inspected by running ECHO-T2DM with inputs that are specifically designed to isolate and investigate the effects of this sub-module on other parts of the model simulation. While these tests are being carried out regularly to verify that the ECHO-T2DM model calculations perform in line with expected outcomes, we do not follow a set protocol nor are these test results reported.

Additionally, prior to model execution, ECHO-T2DM evaluates the model inputs for nonsensical, impermissible values (e.g., negative ages or biomarker values), and the user is prompted to adjust any offending inputs to ensure consistency with model requirements.

## **Part D: Operational Validation**

- **D1: Have experts been asked to judge the appropriateness of the model outcomes?**

Yes. Several HTA bodies have judged that the model outcomes are appropriate. NICE (UK), SMC (Scotland), NCPE (Ireland), and CADTH have all reviewed the model itself and applications of the model as part of reimbursement submissions.

NICE Evidence Review Group, The Southampton Health Technology Assessment Centre (SHTAC) [6] concluded that:

- “The economic model captures all important aspects of the disease pathway and extrapolates intermediate outcomes to final outcomes in a robust and consistent manner, drawing upon standard sources from the literature. The model has been very well validated against external data” (p. 14-15)
- “Overall the ERG considers that the model is internally consistent and very well-validated, and that the results of the model make intuitive sense” (p. 120)

Modeling guidelines were followed in the construction of ECHO-T2DM, including the decision of what outcomes to report. ECHO-T2DM reports a comprehensive set of outcomes that includes the standard set expected of DM models plus many more to enable a full examination of model results. By providing this level of transparency, we enable all concerned experts to assess appropriateness of the model for a broad range of outcomes, including for example,

- Summary measures of health economic endpoints, including, costs, LYs, survival, QALYs, ICERs, NNT, NMB, CEACs, scatterplots
- Cumulative incidence of individual micro- and macrovascular complications, survival
- Simulated biomarker evolution over time (e.g., HbA1c, SBP, BMI, cholesterol, eGFR, heart rate)
- Treatment use over time, average time until treatment failure
- Adverse event rates

Adequacy of outcomes reporting was a key topic also of the Mt. Hood Challenge 8 (2016). The conference consisted of two challenges:

- (1) Transparency: Consisted of replicating two studies (Baxter et al, 2016 [17], and UKPDS 72 [18]) based only on publicly available information. The purpose was to determine what is required for replicability and ultimately, collectively among the modeling groups, develop reporting guidelines on what should be included in published articles to increase transparency (e.g., in terms of reported inputs, assumptions, settings)
- (2) Communicating outcomes: Each modeling group were given standard sets of different baseline patient characteristics (cohorts) and pre-defined settings and were asked to run these cohorts in their model, and generate outcomes in form of life-expectancy. The purpose of this challenge was to enable comparison of model outcomes based on the same inputs)
- Modeling groups presented their results, which were then compared and contrasted by all groups and public
- A consensus statement on how to report outcomes of modelling in diabetes is in preparation.

- **D2: Have the model outcomes been compared to the outcomes of other models that address similar problems?**

Yes, ECHO-T2DM has been routinely compared and contrasted with other simulation models of diabetes. For example, ECHO-T2DM has been represented at the four most recent Mt. Hood Challenges (see response to **A2**). At Mt. Hood Challenge 5 (2010), 8 different models of diabetes participated in at least one of those Challenges.

- “The general consensus on the results presented at the Fifth Mount Hood Challenge was that, in general, the models performed reasonably well in terms of predicting the relative risk of interventions versus control treatments” [10] (p. 679)

We have also carried out a cross-validation vs. the NIH model and presented results in [19]. We have updated this and the results are included in the manuscript under submission.

NICE review of canagliflozin (ECHO-T2DM), empagliflozin (UKPDS-OM1), and dapagliflozin (Cardiff diabetes model) comparing to their AG analysis (UKPDS-OM1) in 2016 [2] (p. 37):

- “The committee acknowledged there were different advantages and disadvantages to the different modelling approaches, and it agreed with the AG that all models submitted were appropriate and of a reasonable quality”

- **D3: Have the model outcomes been compared to the outcomes obtained when using alternative input data?**

Yes. In the most recent model validation [16] results were generated for each of the four CVD risk equations supported in ECHO-T2DM (UKPDS 82 [20], UKPDS 68 [21], ADVANCE [22], and Swedish NDR [23]) and the results were compared and contrasted.

- **D4: Have the model outcomes been compared to empirical data?**

Yes, formal external validation of ECHO-T2DM have been conducted twice, in 2013 and 2017 [16, 19].

In addition, NICE Evidence Review Group (ERG) conducted by Southampton Health Technology Assessment Centre (SHTAC) independently concluded for the previous version of ECHO-T2DM that:

- “The model has been very well validated against external data” (p. 14-15)
- “Overall the ERG considers that the model is internally consistent and very well-validated” (p. 120) [6]

Additionally, comparison of model results to empirical data is a common theme of the Mt. Hood Challenges. In particular, ECHO-T2DM participated in the Fifth Mt Hood conference, which found that:

- “The general consensus on the results presented at the Fifth Mount Hood Challenge was that, in general, the models performed reasonably well in terms of predicting the relative risk of interventions versus control treatments” [10] (p. 679)

As part of ECHO-T2DM participation at the Mt. Hood Challenge 6 (2012), where the tasks were to predict CVD and mortality patterns observed in naturalistic data (Kaiser Permanente Northwest [KPNW] in the US and the Swedish National Diabetes Registry [NDR] in Sweden) and an RCT (sub-groups in ADVANCE), the results of ECHO-T2DM simulations were publicly compared to these empirical findings.

As part of ECHO-T2DM participation at the Mt. Hood Challenge 7 (2014), where the tasks were to (1) replicate the Look AHEAD study, and (2) replicate mortality after various CVD events from an observational study [12], the results of ECHO-T2DM simulations were publicly compared to these empirical findings.

### **Part E: Other Validation Techniques**

- **E1: Have any other validation techniques been performed?**

The formal validation of ECHO-T2DM [16] included examination of face validity, debugging and stress testing, cross-validation, and dependent and independent validation. Back-of-the-envelope calculations is regularly used to evaluate the face validity of model updates, and double programming is used to double-check the ECHO-T2DM implementation of risk equations.



## References

1. Charokopou M, Sabater FJ, Townsend R, Roudaut M, McEwan P, Verheggen BG. Methods applied in cost-effectiveness models for treatment strategies in type 2 diabetes mellitus and their use in Health Technology Assessments: a systematic review of the literature from 2008 to 2013. *Current medical research and opinion*. 2016 Feb;32(2):207-18.
2. NICE. Final appraisal determination - Canagliflozin, dapagliflozin and empagliflozin as monotherapies for treating type 2 diabetes National Institute for Health and Care Excellence; 2016.
3. CDEC. CDEC Final Recommendation - Canagliflozin (Invokana - Janssen Inc.) 2015 January 15; Available from: [https://www.cadth.ca/media/cdr/complete/cdr\\_complete\\_SR0370\\_Invokana\\_Jan-19\\_15.pdf](https://www.cadth.ca/media/cdr/complete/cdr_complete_SR0370_Invokana_Jan-19_15.pdf)
4. SMC. Canagliflozin, 100mg and 300mg film-coated tablets (Invokana). Scotland: Scottish Medicines Consortium; 2014 09 May.
5. NCPE. Cost Effectiveness of canagliflozin (Invokana®) for adults with type 2 diabetes mellitus to improve glycaemic control as monotherapy or add-on therapy with other anti-hyperglycaemic agents including insulin, when these, together with diet and exercise, do not provide adequate glycaemic control. 2014; Available from: <http://www.ncpe.ie/wp-content/uploads/2013/04/Summary-Canagliflozin2.pdf>
6. Copley V, Pickett K, Shepherd J, Loveman E, Jones J. Canagliflozin in combination therapy for treating type 2 diabetes: A Single Technology Appraisal: Southampton Health Technology Assessments Centre (SHTAC); 2013.
7. NICE. Canagliflozin in combination therapy for treating type 2 diabetes - Technology appraisal guidance (TA315): National Institute for Health and Care Excellence; 2014.
8. Mount Hood Diabetes Challenge Network. [cited 2019 December]; Available from: <https://www.mthooddiabeteschallenge.com/>
9. The Mount Hood 4 Modeling Group. Computer modeling of diabetes and its complications: a report on the Fourth Mount Hood challenge meeting. *Diabetes care*. 2007 Jun;30(6):1638-46.
10. Palmer AJ, Mount Hood 5 Modeling G, Clarke P, Gray A, Leal J, Lloyd A, et al. Computer modeling of diabetes and its complications: a report on the Fifth Mount Hood challenge meeting. *Value in Health*. 2013 Jun;16(4):670-85.
11. Mount Hood Challenge 2016 web page. 2016; Available from: <http://www.mthooddiabeteschallenge.com/>
12. Kelly PJ, Clarke PM, Hayes AJ, Gerdtham UG, Cederholm J, Nilsson P, et al. Predicting mortality in people with type 2 diabetes mellitus after major complications: a study using Swedish National Diabetes Register data. *Diabetic medicine : a journal of the British Diabetic Association*. 2014 Aug;31(8):954-62.

13. Bagust A, Beale S. Modelling EuroQol health-related utility values for diabetic complications from CODE-2 data. *Health economics*. 2005 Mar;14(3):217-30.
14. CADTH. Common Drug Review: Pharmacoeconomic Review Report- Canagliflozin (Invokana). 2015.
15. Akpo E, Neslusan C, Joris K. An audit approach to the validation of health economics simulation models: The case of the Economic and Health Outcomes Model for Type 2 Diabetes Mellitus (ECHO-T2DM) - Manuscript in preparation 2016.
16. Willis M, Johansen P, Nilsson A, Asseburg C. Validation of the Economic and Health Outcomes Model of Type 2 Diabetes Mellitus (ECHO-T2DM). *PharmacoEconomics*. 2017 Mar;35(3):375-96.
17. Baxter M, Hudson R, Mahon J, Bartlett C, Samyshkin Y, Alexiou D, et al. Estimating the impact of better management of glycaemic control in adults with Type 1 and Type 2 diabetes on the number of clinical complications, and the associated financial benefit. *Diabetic medicine : a journal of the British Diabetic Association*. 2016 Jan 16.
18. Clarke PM, Gray AM, Briggs A, Stevens RJ, Matthews DR, Holman RR. Cost-utility analyses of intensive blood glucose and tight blood pressure control in type 2 diabetes (UKPDS 72). *Diabetologia*. 2005 May;48(5):868-77.
19. Willis M, Asseburg C, He J. Validation of economic and health outcomes simulation model of type 2 diabetes mellitus (ECHO-T2DM). *Journal of medical economics*. 2013 Aug;16(8):1007-21.
20. Hayes AJ, Leal J, Gray AM, Holman RR, Clarke PM. UKPDS outcomes model 2: a new version of a model to simulate lifetime health outcomes of patients with type 2 diabetes mellitus using data from the 30 year United Kingdom Prospective Diabetes Study: UKPDS 82. *Diabetologia*. 2013 Sep;56(9):1925-33.
21. Clarke PM, Gray AM, Briggs A, Farmer AJ, Fenn P, Stevens RJ, et al. A model to estimate the lifetime health outcomes of patients with type 2 diabetes: the United Kingdom Prospective Diabetes Study (UKPDS) Outcomes Model (UKPDS no. 68). *Diabetologia*. 2004 Oct;47(10):1747-59.
22. Kengne AP, Patel A, Marre M, Travert F, Lievre M, Zoungas S, et al. Contemporary model for cardiovascular risk prediction in people with type 2 diabetes. *European journal of cardiovascular prevention and rehabilitation : official journal of the European Society of Cardiology, Working Groups on Epidemiology & Prevention and Cardiac Rehabilitation and Exercise Physiology*. 2011 Jun;18(3):393-8.
23. Zethelius B, Eliasson B, Eeg-Olofsson K, Svensson AM, Gudbjornsdottir S, Cederholm J. A new model for 5-year risk of cardiovascular disease in type 2 diabetes, from the Swedish National Diabetes Register (NDR). *Diabetes research and clinical practice*. 2011 Aug;93(2):276-84.

## ECHO-T2DM Reference List

- Willis, M., C. Asseburg, S. Borg, U. Persson, and C. Neslusan. "Cost-Effectiveness of Strict "Get To Goal" Treatment Directives in the Treatment of Younger Patients with Newly Diagnosed Type 2 Diabetes Mellitus." Poster presentation at ISPOR 9th Annual European Congress. Dublin, Ireland. October 20-23. 2007.
- Willis, M., S. Borg, U. Persson, and C. Neslusan. "Cost-Effectiveness of Sulfonylureas versus Metformin as First-Line Therapy in Newly Diagnosed Type 2 Diabetes." poster presentation at ADA 67th Scientific Sessions. Chicago, Illinois, USA. June 22-26. 2007.
- Willis, M., and C. Neslusan. "Opportunities to Use Economic Modeling for Internal Pharma Decision-Making in T2DM." Podium presentation at iHEA 6th World Congress. Copenhagen, Denmark. July 8-11. 2007.
- Willis, M., C. Asseburg, C. Neslusan, and U. Persson. "The Cost-Effectiveness of the Early Insulin Use Treatment Pathway in the ADA/EASD Joint Consensus Algorithm for the Treatment of Type 2 Diabetes." Podium presentation at ADA 68th Scientific Sessions. San Francisco, CA, USA. June 6-10. 2008.
- Asseburg, C., M. Willis, U. Persson, C. Neslusan, and J. He. "Validation of the IHE/JJPS Economic Simulation Model of Type 2 Diabetes Mellitus (T2DM)." Poster presentation at ISPOR 14th Annual Meeting Orlando, Florida, USA. May 16-20. 2009.
- He, J., M. Willis, C. Asseburg, C. Neslusan, and U. Persson. "Simulation of the Chinese Diabetes Treatment Guideline using the IHE/JNJ Diabetes Cost-Effectiveness Model." Poster presentation at World Congress on Health Economics, iHEA. Beijing, China. July 12. 2009.
- Willis, M., C. Asseburg, J. He, and C. Neslusan. "The Cost-Effectiveness of "Getting-to Goal" in Patients with Newly Diagnosed Type 2 Diabetes " Podium presentation at ADA 69th Scientific Sessions New Orleans, Louisiana, USA. June 5-9. 2009.
- Willis, M., C. Asseburg, C. Neslusan, and J. He. "The Economic Importance of Metabolic Memory in the Treatment of Type 2 Diabetes Mellitus (T2DM)." Podium presentation at ADA 70th Scientific Sessions. Orlando, Florida, USA. June 25-29. 2010.
- Willis, M., C. Asseburg, C. Neslusan, J. He, and M. Ingham. "The Economic Impact of Weight Loss for Patients with Newly Diagnosed Type 2 Diabetes Mellitus (T2DM) in the US." Poster presentation at ISPOR 15th Annual Meeting. Atlanta, GA, USA. May 15-19. 2010.
- Willis, M., J. He, C. Neslusan, and E. Chievic. "The Economic Importance of Metabolic Memory in the Treatment of Type 2 Diabetes Mellitus (T2DM)." Poster presentation at ISPOR 13th Annual European Congress. Prague, Czech Republic. November 6-9. 2010.
- He, J., C. Neslusan, M. Willis, and M. Worbes-Cerezo. "The Cost-Effectiveness of getting to Glucose, Blood Pressure, and Lipid Goals in Patients Newly Diagnosed with Type 2 Diabetes Mellitus (T2DM) and Younger Than Fifty in Sweden." Poster presentation at ISPOR 14th Annual European Congress. Madrid, Spain. November 5-8. 2011.
- Willis, M., C. Asseburg, J. He, and C. Neslusan. "Validation of Economic Simulation Models Using Clinical Trial Results: Experiences from Type 2 Diabetes Mellitus (T2DM)." Podium presentation at iHEA World Congress. Toronto, Canada. 10-13 July. 2011.
- Willis, M., C. Neslusan, C. Asseburg, and J. He. "Initial HbA1c and HbA1c Lowering: Implications for Model-Based Economic Evaluations in Type 2 Diabetes Mellitus (T2DM)." Podium presentation at ADA 71st Scientific Sessions. San Diego, CA, USA. June 24-28. 2011.
- Willis, M., C. Neslusan, J. He, and M. Worbes-Cerezo. "The Economic Impact of Weight Loss in Patients Newly Diagnosed with Type 2 Diabetes Mellitus (T2DM) and Younger than 50 in Sweden." Poster presentation at ISPOR 14th Annual European Congress. Madrid, Spain. November 5-8. 2011.

- Johansen, P., A. Teschemaker, N. Brazier, C. Neslusan, and M. Willis. "Effect of Modest Weight Loss on Long-term Health Outcomes in People Newly Diagnosed with Type 2 Diabetes Mellitus (T2DM) in Canada." Poster presentation at CDA/CSEM Professional Conference and Annual Meetings. Vancouver, Canada. October 10-13. 2012.
- Teschemaker, A., P. Johansen, N. Brazier, C. Neslusan, and M. Willis. "The Health Impact of Getting to Glucose, Systolic Blood Pressure (SBP), and Serum Cholesterol Goals in People Newly Diagnosed with Type 2 Diabetes Mellitus (T2DM) in Canada." Poster presentation at CDA/CSEM Professional Conference and Annual Meetings. Vancouver, Canada. October 10-13. 2012.
- Willis, M., J. He, C. Neslusan, P. Johansen, and M. Worbes-Cerezo. "The Importance of HbA1c Evolution in Cost-effectiveness Modeling of Type 2 Diabetes Mellitus (T2DM)." Poster presentation at ISPOR 15th Annual European Congress. Berlin, Germany. November 3-7. 2012.
- Willis, M., C. Neslusan, and J. He. "Implications of Key Biomarker Trends on Health Outcomes in Patients with Type 2 Diabetes Mellitus (T2DM) in the US " Podium presentation at ADA 72nd Scientific Sessions. Philadelphia, Pennsylvania, USA. June 8-12. 2012.
- Girod, I., M. Willis, P. Johansen, M. Schroeder, G. Thompson, and C. Neslusan. "Sources of Long-term Quality Adjusted Life (QALY) Gains for Canagliflozin (CANA) versus Glimepiride (GLIM) in the Treatment of Type 2 Diabetes Mellitus (T2DM) in the UK Setting." Poster presentation at ISPOR 16th Annual European Congress. Dublin, Ireland. November 2-6. 2013.
- Neslusan, C., P. Johansen, M. Willis, and S. Martin. "A Health Economic Analysis of the Long-term Benefits and Associated Cost Offsets of Canagliflozin Monotherapy in the United States." Poster presentation at ADA 73rd Scientific Sessions. Chicago, IL, USA. June 21-25. 2013.
- Neslusan, C., A. Teschemaker, P. Johansen, M. Willis, A. Valencia, and A. Puig. "A Health Economic Analysis of the Long-term Benefits and Associated Cost Offsets of Canagliflozin Dual Therapy in Mexico." Poster presentation at ISPOR 4th Latin America Conference. Buenos Aires, Argentina. September 12-14. 2013.
- Schroeder, M., M. Willis, P. Johansen, I. Girod, C. Neslusan, and G. Thompson. "Impact of Weight Trajectory on Cost-Effectiveness of Treatments of Type 2 Diabetes Mellitus (T2DM)." Poster presentation at ISPOR 16th Annual European Congress. Dublin, Ireland. November 2-6. 2013.
- Thompson, G., M. Willis, P. Johansen, C. Neslusan, M. Schroeder, and I. Girod. "Assessment of the Key Drivers of the Cost-Effectiveness in the Economic Modelling of Canagliflozin (CANA) versus Glimepiride (GLIM) in the Treatment of Type 2 Diabetes Mellitus (T2DM) in the UK Setting." Poster presentation at ISPOR 16th Annual European Congress, . Dublin, Ireland. November 2-6. 2013.
- Willis, M., C. Asseburg, and J. He. 2013. 'Validation of economic and health outcomes simulation model of type 2 diabetes mellitus (ECHO-T2DM)', *J Med Econ*, 16: 1007-21.
- Willis, M., P. Johansen, M. Schroeder, G. Thompson, I. Girod, and C. Neslusan. "Sources of Long-term Quality Adjusted Life (QALY) Gains for Canagliflozin (CANA) versus Sitagliptin (SITA) in the Treatment of Type 2 Diabetes Mellitus (T2DM) in the UK Setting." poster presentation at ISPOR 16th Annual European Congress. Dublin, Ireland. November 2-6. 2013.
- Bacon, T., M. Willis, P. Johansen, C. Neslusan, S. Nuhoho, and M. Worbes-Cerezo. "Is Canagliflozin Cost-Effective Compared to Sitagliptin Across Multiple Lines of type 2 Diabetes Mellitus Therapy in Ireland?" Poster presentation at ISPOR 17th Annual European Congress. Amsterdam, Netherlands. November 8-12. 2014a.
- Bacon, T., M. Willis, P. Johansen, C. Neslusan, S. Nuhoho, and M. Worbes-Cerezo. "The Cost-Effectiveness of Canagliflozin Versus Insulin Secretagogues (Sulphonylureas) or Insulin in Patients with Type 2 Diabetes Mellitus as Add-on to Metformin in Ireland." Poster

- presentation at ISPOR 17th Annual European Congress. Amsterdam, Netherlands. November 8-12. 2014b.
- Bacon, T., M. Willis, P. Johansen, C. Neslusan, S. Nuhoho, and M. Worbes-Cerezo. "The Cost-Effectiveness of Canagliflozin Versus Liraglutide in Patients With Type 2 Diabetes Failing to Achieve Glycaemic Control on Metformin Monotherapy in Ireland." Poster presentation at ISPOR 17th Annual European Congress. Amsterdam, Netherlands. November 8-12. 2014c.
- Martin, S., C. Neslusan, L. Vo, A. Teschemaker, P. Johansen, and M. Willis. "The Cost-Effectiveness of Canagliflozin (CANA) Versus Sitagliptin (SITA) as an Add-on to Metformin (MET) in the Treatment of Type 2 Diabetes Mellitus (T2DM) in the US." Poster presentation at ADA 74th Scientific Sessions. San Francisco, CA, USA. June 13-17. 2014.
- Neslusan, C., S. Martin, A. Teschemaker, L. Vo, P. Johansen, and M. Willis. "Cost-effectiveness Analysis of Canagliflozin Versus Maximally Titrated Glimepiride as an Add-on to Metformin in Patients With Type 2 Diabetes Mellitus in the United States." Poster presentation at ADA 74th Scientific Sessions. San Francisco, CA, USA. June 13-17. 2014.
- Neslusan, C., A. Teschemaker, S. Martin, M. Willis, P. Johansen, and L. Vo. "Cost-Effectiveness Analysis of Canagliflozin (CANA) Versus Dapagliflozin (DAPA) as an Add-On to Metformin (MET) in Patients With Type 2 Diabetes Mellitus (T2DM) in the United States." Poster presentation at ISPOR 19th Annual International Meeting. Montreal, QC, Canada. May 31 – June 3. 2014.
- Schroeder, M., P. Johansen, G. Thompson, C. Neslusan, and M. Willis. "The Cost-Effectiveness of Canagliflozin Versus Dapagliflozin in Patients With Type 2 Diabetes Mellitus With Inadequate Control on metformin Monotherapy in the United Kingdom." Poster presentation at ISPOR 17th Annual European Congress Amsterdam, Netherlands. November 8-12. 2014.
- Thompson, G., M. Schroeder, C. Neslusan, M. Willis, P. Johansen, and A. Teschemaker. "The Cost-Effectiveness of Canagliflozin (CANA) versus Sitagliptin (SITA) as Third-Line Therapy in the Treatment of Type 2 Diabetes Mellitus in the U.K." Poster presentation at EASD 50th Annual Meeting. Stockholm, Sweden. September 15-19. 2014.
- Yoong, K., M. Willis, P. Johansen, C. Yim, A. Teschemaker, and C. Neslusan. "The Impact of Alternative Estimates of Disutilities Associated with Hypoglycemia on Net QALYs: Canagliflozin versus Sitagliptin as Add-On Therapy in Individuals with Type 2 Diabetes Mellitus (T2DM) Inadequately Controlled on a Background of Metformin (MET) plus Sulfonylurea (SU) in the Canadian Setting." poster presentation at ISPOR 19th Annual International Meeting. Montreal, QC, Canada. May 31 – June 3. 2014.
- Bacon, T., M. Willis, P. Johansen, and C. Neslusan. "Time Until Insulin Initiation for Canagliflozin Versus Dapagliflozin in Dual and Triple Therapy for Type 2 Diabetes Mellitus in Ireland." Poster presentation at ISPOR 20th Annual Meeting. Philadelphia, Pennsylvania, USA. May 16-20. 2015.
- Neslusan, Cheryl, Anna Teschemaker, Pierre Johansen, Michael Willis, Atanacio Valencia-Mendoza, and Andrea Puig. 2015. 'Cost-Effectiveness of Canagliflozin versus Sitagliptin as add-on to Metformin in patients with type 2 diabetes mellitus in Mexico', *Value in Health Regional Issues*, 8: 8-19.
- Pititto, L., C. Neslusan, A. Teschemaker, P. Johansen, M. Willis, E. Asano, and A. Puig. "Cost-effectiveness of Canagliflozin Versus Sitagliptin as Add-on to Metformin Plus Sulfonylurea in Patients With Type 2 Diabetes Mellitus in Brazil." Poster presentation at ISPOR 5th Latin America Conference Santiago, Chile. September 6-8. 2015.
- Sabapathy, S., C. Neslusan, K. Yoong, A. Teschemaker, P. Johansen, and M. Willis. "The Cost-Effectiveness of Canagliflozin Versus Sitagliptin in Patients With Type 2 Diabetes Mellitus Inadequately Controlled on Metformin and Sulfonylurea in a Canadian Setting." Poster presentation at ISPOR 20th Annual Meeting Philadelphia, Pennsylvania, USA. May 16-20. 2015a.

- Sabapathy, S., C. Neslusan, K. Yoong, A. Teschemaker, P. Johansen, and M. Willis. "Impact of Weight-related Utilities on the Cost-Effectiveness of Canagliflozin Versus Sitagliptin as Third-line Therapy in Type 2 Diabetes Mellitus in a Canadian Setting." poster presentation at ISPOR 20th Annual Meeting. Philadelphia, Pennsylvania, USA. May 16-20. 2015b.
- Schroeder, M., P. Johansen, M. Willis, and C. Neslusan. "The Cost-Effectiveness of Canagliflozin Versus Sulphonylurea in Patients With Type 2 Diabetes With inadequate Control on Metformin Monotherapy in the United Kingdom." Poster presentation at Diabetes UK Professional Conference, . London, U.K. March 11-15. 2015a.
- Schroeder, M., P. Johansen, M. Willis, and C. Neslusan. "The Cost-Effectiveness of Canagliflozin Versus Dapagliflozin and Empagliflozin in Patients With Type 2 Diabetes Mellitus as Monotherapy in the United Kingdom." Poster presentation at ISPOR 18th European Annual Meeting. Milan, Italy. November 7-11. 2015b.
- Teschemaker, A., C. Neslusan, S. Sabapathy, K. Yoong, P. Johansen, and M. Willis. "The Cost-Effectiveness of Canagliflozin Versus Saxagliptin Among Older Individuals Living with Type 2 Diabetes Mellitus in Canadas." Poster presentation at ISPOR 20th Annual Meeting. Philadelphia, Pennsylvania, USA. May 16-20. 2015.
- Willis, M., P. Johansen, and C. Neslusan. "The Effect of Treatment Intensification Assumptions on Estimates of Cost-Effectiveness in Type 2 Diabetes Mellitus." Poster presentation at ISPOR 20th Annual Meeting. Philadelphia, Pennsylvania, USA. May 16-20. 2015.
- Willis, M., C. Neslusan, P. Johansen, A. Nilsson, C. Asseburg, and M. Schroeder. "The Economic Consequences of Clinical Inertia in Treatment Intensification for Type 2 Diabetes Mellitus (T2DM) in the UK." Podium presentation at EASD 51st Annual Meeting. Stockholm, Sweden. September 14-18. 2015.
- Willis, M., C. Neslusan, S. Martin, P. Johansen, C. Asseburg, and D. O'Brien. "Threshold-Based Metrics may not Value all Benefits of Improved HbA1c: Implications for Health Care Resource Allocation." poster presentation at International Diabetes Federation - World Diabetes Congress. Vancouver, Canada. November 30 – December 4. 2015.
- Asseburg, C., M. Willis, P. Johansen, A. Nilsson, C. Neslusan, and M. Schroeder. "Update of the Model Validation of the Economic and Health Outcomes Model of Type 2 Diabetes Mellitus (ECHO-T2DM)." Poster Presentation at ISPOR 21st Annual International Meeting. Washington DC, USA. May 21-25. 2016.
- Neslusan, C., M. Willis, P. Johansen, M. Schroeder, A. Nilsson, E. Chan, C. Asseburg, and A. Schubert. "The Role of Estimated Glomerular Filtration Rate in Cost-Effectiveness Analyses Using Canagliflozin vs Sulfonylurea to Treat Type 2 Diabetes Mellitus." Poster presentation at ADA 76th Scientific Sessions. New Orleans, LA, USA. June 10-14. 2016.
- Sabapathy, S., C. Neslusan, K. Yoong, A. Teschemaker, P. Johansen, and M. Willis. 2016. 'Cost-effectiveness of Canagliflozin versus Sitagliptin When Added to Metformin and Sulfonylurea in Type 2 Diabetes in Canada', *J Popul Ther Clin Pharmacol*, 23: e151-68.
- Schroeder, M., E. Chan, M. Willis, P. Johansen, A. Nilsson, A. Schubert, and C. Neslusan. "Time Until Insulin Initiation for Canagliflozin Versus Sitagliptin in Dual Therapy and Triple Therapy for Type 2 Diabetes Mellitus in the UK." Poster presentation at ADA 76th Scientific Sessions. New Orleans, LA, USA. June 10-14. 2016a.
- Schroeder, M., E. Chan, M. Willis, P. Johansen, A. Nilsson, A. Schubert, and C. Neslusan. "Time Until Insulin Initiation for Canagliflozin Versus Dapagliflozin and Empagliflozin in Dual and Triple Therapy for Type 2 Diabetes Mellitus in the UK." Poster presentation at ISPOR 21st Annual International Meeting. Washington DC, USA. May 21-25. 2016b.
- Willis M, Neslusan C, Johansen P, Nilsson A. (2017) "The Importance of Considering the Evolving Evidence Base on Cardiovascular Effects of Anti-Hyperglycemic Agents on Estimates of

“Value for Money” Poster presentation at ADA 77th Scientific Sessions, San Diego, CA USA, June 9-13, 2017

- Willis, M., Johansen, P., Nilsson, A. and Asseburg, C. (2017). “Validation of the Economic and Health Outcomes Model of T2DM (ECHO-T2DM)”, *Pharmacoeconomics* 2017;35:375-396
- Willis M, Neslusan C, Nilsson A, Asseburg C. (2018), “Assessing the Value of Canagliflozin Versus Sitagliptin as Second-Line Therapy in the United States: The Importance of Considering Evidence From the CANVAS Program” Poster presentation at ADA 78th Scientific Sessions, Orlando, FL USA, June 22-26, 2018
- Neslusan C, Teschmaker A, Willis M, Johansen P, Vo L. (2018), “Cost-Effectiveness Analysis of Canagliflozin 300 mg Versus Dapagliflozin 10 mg Added to Metformin in Patients with Type 2 Diabetes in the United States” *Diabetes therapy*. 2018 Apr;9(2):565-81.
- Gupta V, Willis M, Johansen P, Nilsson A, Shah M, Mane A, Neslusan C. (2018), “Long-Term Clinical Benefits of Canagliflozin 100 mg versus Sulfonylurea in Patients with Type 2 Diabetes Mellitus Inadequately Controlled with Metformin in India” *Value in Health Regional Issues*, Volume 18, 65-73 (2019)
